# Supplementary material for: Prevalence of anxiety and depression in South Asia during COVID-19: A systematic review and meta-analysis
Source: PubMed Central journal article supplement — Heliyon. 2021 Apr 5;7(4):e06677. doi: 10.1016/j.heliyon.2021.e06677 (PMC8056240; doi:10.1016/j.heliyon.2021.e06677), 2021-04-05
Supplement: mmc1.pdf [file mmc1.pdf]

### Supplementary file- A: Risk of bias assessment

| Authors            | Year | Representativeness of the sample | Justified sample size | Response rate above 80% | Valid measurement tool | Appropriate statistical analysis and cut-off values | Total quality score | Risk of bias (H- High; L-Low) |
|--------------------|------|----------------------------------|-----------------------|-------------------------|------------------------|-----------------------------------------------------|---------------------|-------------------------------|
| Ahmad et al.       | 2020 | 0                                | 1                     | 0                       | 1                      | 1                                                   | 3                   | L                             |
| Ahmed et al.       | 2020 | 0                                | 0                     | 0                       | 1                      | 1                                                   | 2                   | H                             |
| Amin et al.        | 2020 | 0                                | 1                     | 0                       | 1                      | 1                                                   | 3                   | L                             |
| Banna et al.       | 2020 | 0                                | 0                     | 0                       | 1                      | 1                                                   | 2                   | H                             |
| Chatterjee et al.  | 2020 | 0                                | 0                     | 0                       | 1                      | 1                                                   | 2                   | H                             |
| Chew et al. a      | 2020 | 0                                | 0                     | 1                       | 1                      | 1                                                   | 3                   | L                             |
| Chew et al. b      | 2020 | 0                                | 0                     | 1                       | 1                      | 1                                                   | 3                   | L                             |
| Desai et al.       | 2020 | 0                                | 1                     | 0                       | 1                      | 0                                                   | 2                   | H                             |
| Grover et al.      | 2020 | 0                                | 0                     | 0                       | 1                      | 1                                                   | 2                   | H                             |
| Gupta AK et al.    | 2020 | 0                                | 0                     | 0                       | 1                      | 0                                                   | 1                   | H                             |
| Gupta et al. a     | 2020 | 0                                | 1                     | 0                       | 0                      | 1                                                   | 2                   | H                             |
| Gupta et al. b     | 2020 | 0                                | 1                     | 0                       | 0                      | 1                                                   | 2                   | H                             |
| Hasan et al.       | 2020 | 0                                | 0                     | 0                       | 1                      | 1                                                   | 2                   | H                             |
| Hossain et al.     | 2020 | 0                                | 0                     | 0                       | 1                      | 1                                                   | 2                   | H                             |
| Imran et al. a     | 2020 | 0                                | 1                     | 0                       | 1                      | 1                                                   | 3                   | L                             |
| Imran et al. b     | 2020 | 0                                | 0                     | 0                       | 1                      | 1                                                   | 2                   | H                             |
| Islam et al. a     | 2020 | 0                                | 0                     | 0                       | 1                      | 1                                                   | 2                   | H                             |
| Islam et al. b     | 2020 | 0                                | 0                     | 0                       | 1                      | 1                                                   | 2                   | H                             |
| Jain et al.        | 2020 | 0                                | 1                     | 0                       | 1                      | 1                                                   | 3                   | L                             |
| Khanal et al.      | 2020 | 0                                | 0                     | 0                       | 1                      | 1                                                   | 2                   | H                             |
| Khanna et al.      | 2020 | 0                                | 0                     | 0                       | 1                      | 1                                                   | 2                   | H                             |
| Mamun et al.       | 2020 | 0                                | 0                     | 1                       | 1                      | 1                                                   | 3                   | L                             |
| Mani et al.        | 2020 | 0                                | 0                     | 0                       | 1                      | 1                                                   | 2                   | H                             |
| Nisha S et. Al     | 2020 | 0                                | 0                     | 0                       | 1                      | 1                                                   | 2                   | H                             |
| Patabendige et al. | 2020 | 0                                | 0                     | 0                       | 1                      | 1                                                   | 2                   | H                             |
| Reddy et al.       | 2020 | 0                                | 0                     | 0                       | 1                      | 1                                                   | 2                   | H                             |
| Sandesh et al.     | 2020 | 0                                | 0                     | 0                       | 1                      | 1                                                   | 2                   | H                             |
| Sebastian et al.   | 2020 | 0                                | 1                     | 0                       | 1                      | 1                                                   | 3                   | L                             |
| Sharma et al.      | 2020 | 0                                | 0                     | 0                       | 1                      | 1                                                   | 2                   | H                             |
| Sheshtha et al.    | 2020 | 0                                | 1                     | 0                       | 1                      | 1                                                   | 3                   | L                             |
| Sil et al.         | 2020 | 0                                | 0                     | 0                       | 1                      | 1                                                   | 2                   | H                             |
| Suryavanshi et al. | 2020 | 0                                | 0                     | 0                       | 1                      | 1                                                   | 2                   | H                             |
| Verma et al.       | 2020 | 0                                | 0                     | 1                       | 1                      | 1                                                   | 3                   | L                             |
| Wilson et al.      | 2020 | 0                                | 1                     | 0                       | 1                      | 1                                                   | 3                   | L                             |
| Zubayer et al.     | 2020 | 0                                | 0                     | 0                       | 1                      | 1                                                   | 2                   | H                             |
