# Supplementary material for: Prevalence of anxiety and depression in South Asia during COVID-19: A systematic review and meta-analysis
Source: PubMed Central journal article supplement — Heliyon. 2021 Apr 5;7(4):e06677. doi: 10.1016/j.heliyon.2021.e06677 (PMC8056240; doi:10.1016/j.heliyon.2021.e06677), 2021-04-05
Supplement: mmc4.pdf [file mmc4.pdf]

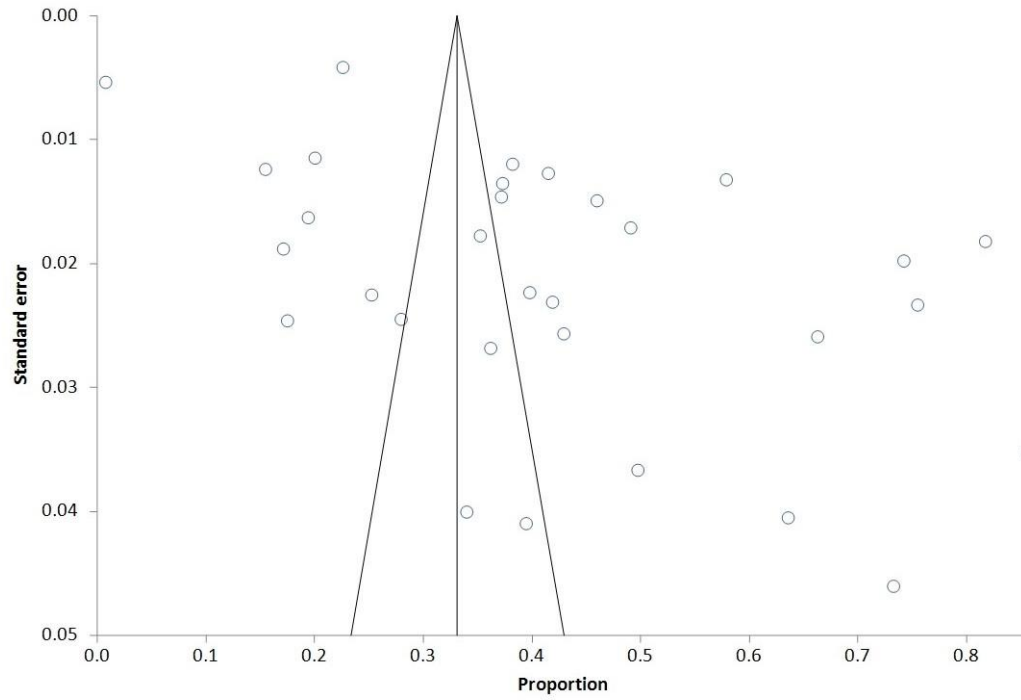

Supplementary file D-1: Funnel plot for publication bias on studies reporting anxiety

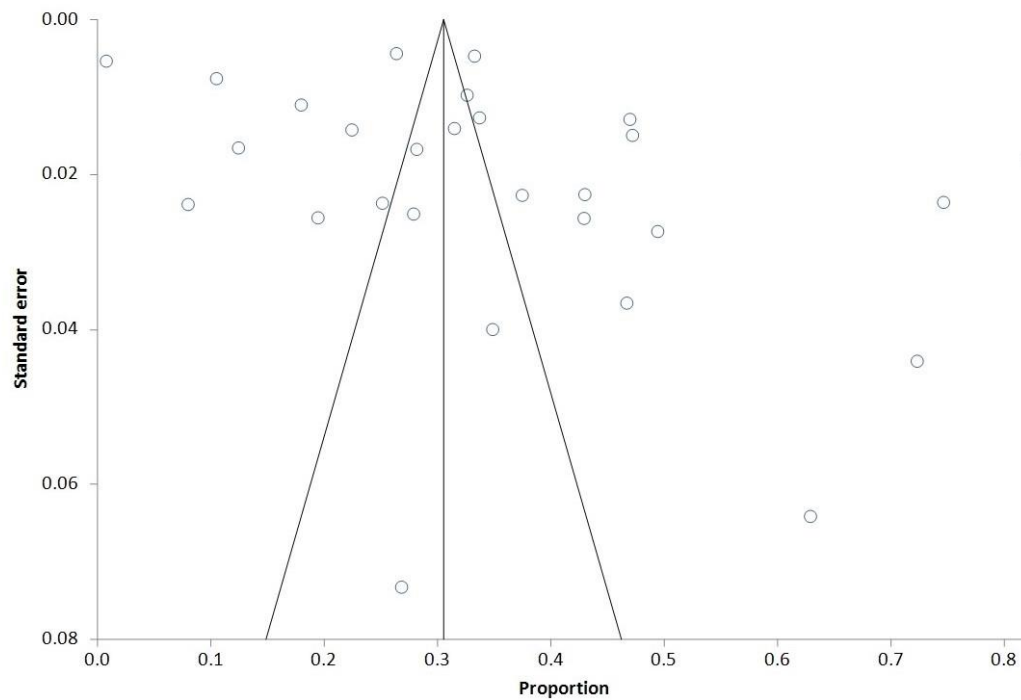

Supplementary file D-1: Funnel plot for publication bias on studies reporting anxiety
